# Supplementary material for: The Transcription Factors Snail and Slug Activate the Transforming Growth Factor-Beta Signaling Pathway in Breast Cancer
Source: PubMed Central journal article supplement (PMC3197668; doi:10.1371/journal.pone.0026514), 2011-10-20
Supplement: pone.0026514.s007.pdf [file pone.0026514.s007.pdf]

**TABLE S1**

| <b>Day</b> | <b>Snail Vs Control</b>    | <b>Slug Vs Control</b>     | <b>Common<br/>(Snail and<br/>Slug)</b> | <b>Snail<br/>specific</b> | <b>Slug<br/>specific</b> |
|------------|----------------------------|----------------------------|----------------------------------------|---------------------------|--------------------------|
| 1          | 975 (795 down +180<br>up)  | 107(46 down+ 61 up)        | 94                                     | 881                       | 13                       |
| 2          | 1658 (1281 down+377<br>up) | 134(69 down+ 65 up)        | 111                                    | 1547                      | 23                       |
| 4          | 1559 (1210 down+349<br>up) | 1551(1305 down+ 246<br>up) | 886                                    | 673                       | 665                      |
