# Supplementary material for: The Transcription Factors Snail and Slug Activate the Transforming Growth Factor-Beta Signaling Pathway in Breast Cancer
Source: PubMed Central journal article supplement (PMC3197668; doi:10.1371/journal.pone.0026514), 2011-10-20
Supplement: pone.0026514.s008.pdf [file pone.0026514.s008.pdf]

**Table S2**

| RT-PCR primers |                           |
|----------------|---------------------------|
| CLDN7_RT_F     | AGACTTTTATAACCCTTTGATCCCT |
| CLDN7_RT_R     | GTACCCAGCCTTGCTCTCATT     |
| CTGF_RT_F      | TAGAGAAGCAGAGCCGCCT       |
| CTGF_RT_R      | AGAATTTAGCTCGGTATGTCTTCAT |
| SPARC_RT_F     | TGTGACCTGGACAATGACAAGT    |
| SPARC_RT_R     | AAAGAGAGAATCCGGTACTGTG    |
| TAGLN_RT_F     | AAGAATGATGGGCACTACCGT     |
| TAGLN_RT_R     | AGCCCTCTCCGCTCTAACT       |
| CLDN4-RT-F     | GCAGTGCAAGGTGTACGACTC     |
| CLDN4-RT-R     | GCGGATTGTAGAAGTCTTGGA     |

  

| ChIP Primers   |                          |
|----------------|--------------------------|
| TGFBR2_ChIP_AF | CCCTAGCAAGAAAGGAAATTTGAA |
| TGFBR2_ChIP_AR | AGTCACCTGAATGCTTGTGCTT   |
| TGFBR2_ChIP_1F | TTCTGATCTACTAGGGAAAACGT  |
| TGFBR2_ChIP_1R | AGCCCCTCCGAGAGCTTT       |
| TGFBR2_ChIP_2F | ATCCCACCGCACGTTTCAGAAGT  |
| TGFBR2_ChIP_2R | GACTGTCAAGCGCAGCGGAGA    |
| TGFBR2_ChIP_3F | ACGCCTTGGCATGGATGGAT     |
| TGFBR2_ChIP_3R | AGAACCATCAACTCCCTGAAGA   |
| TGFBR2_ChIP_BF | TGAAGGTGGCATGGAGATGGA    |
| TGFBR2_ChIP_BR | AAAAACGCCAAGAACGAAACACTA |
